# Supplementary material
Source: PubMed Central journal article supplement (PMC6075521)
Supplement: ddw367_supp.pdf [file ddw367_supp.pdf]

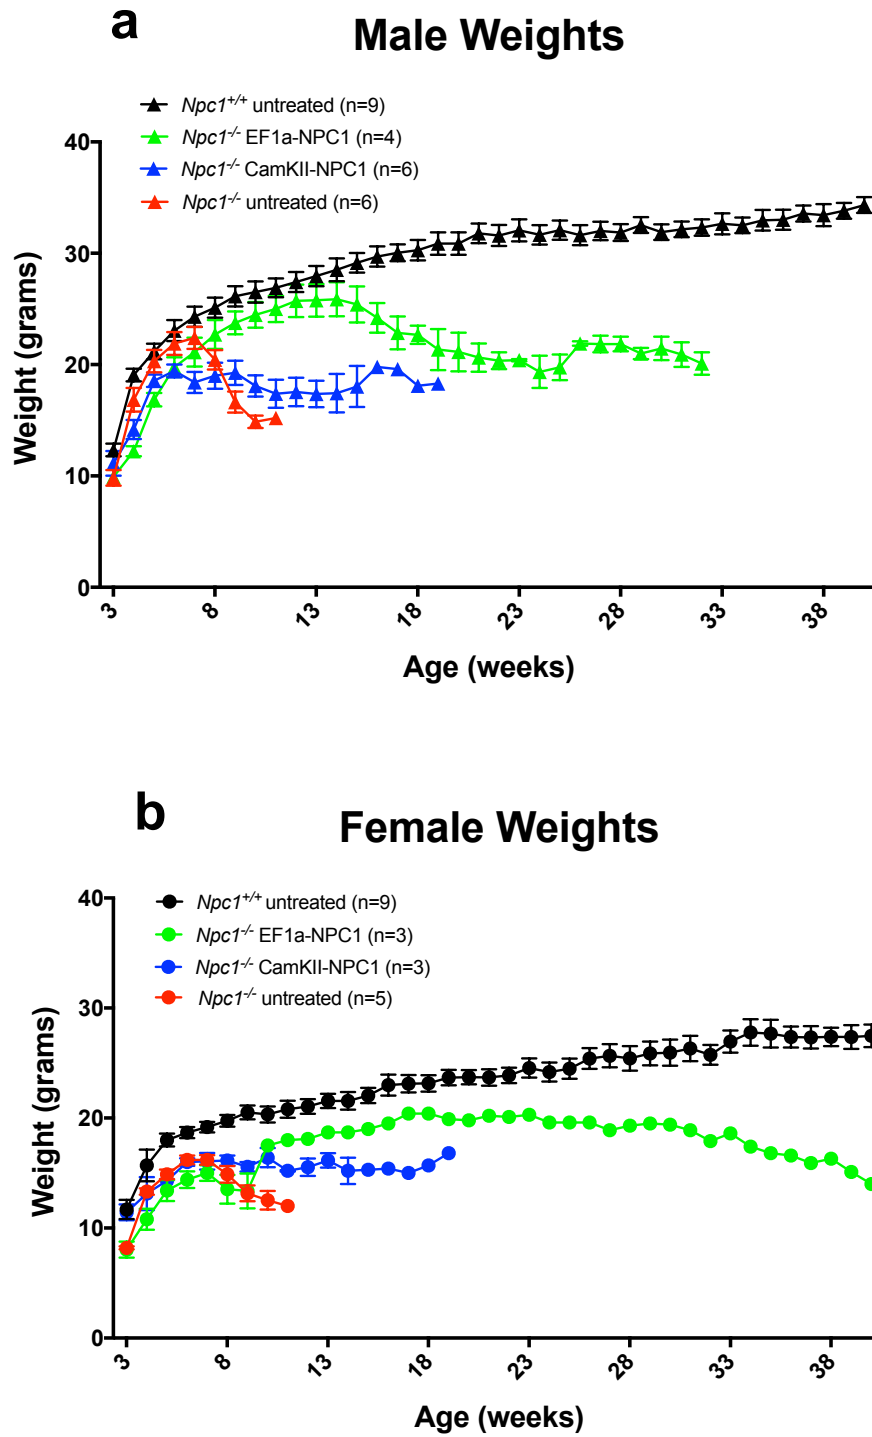

**Supplemental Figure 1. Growth curves of *Npc1*<sup>-/-</sup> mice following AAV9 treatment.**

Growth curves expressed as mean  $\pm$ S.E.M. for each treatment group with separate graph for males (a) and females (b). Initial sample sizes are as indicated on graph.
